# Supplementary material for: Detailed phylogenetic analysis tracks transmission of distinct SARS-COV-2 variants from China and Europe to West Africa
Source: PubMed Central journal article supplement (PMC8548492; doi:10.1038/s41598-021-00267-w), 2021-10-26

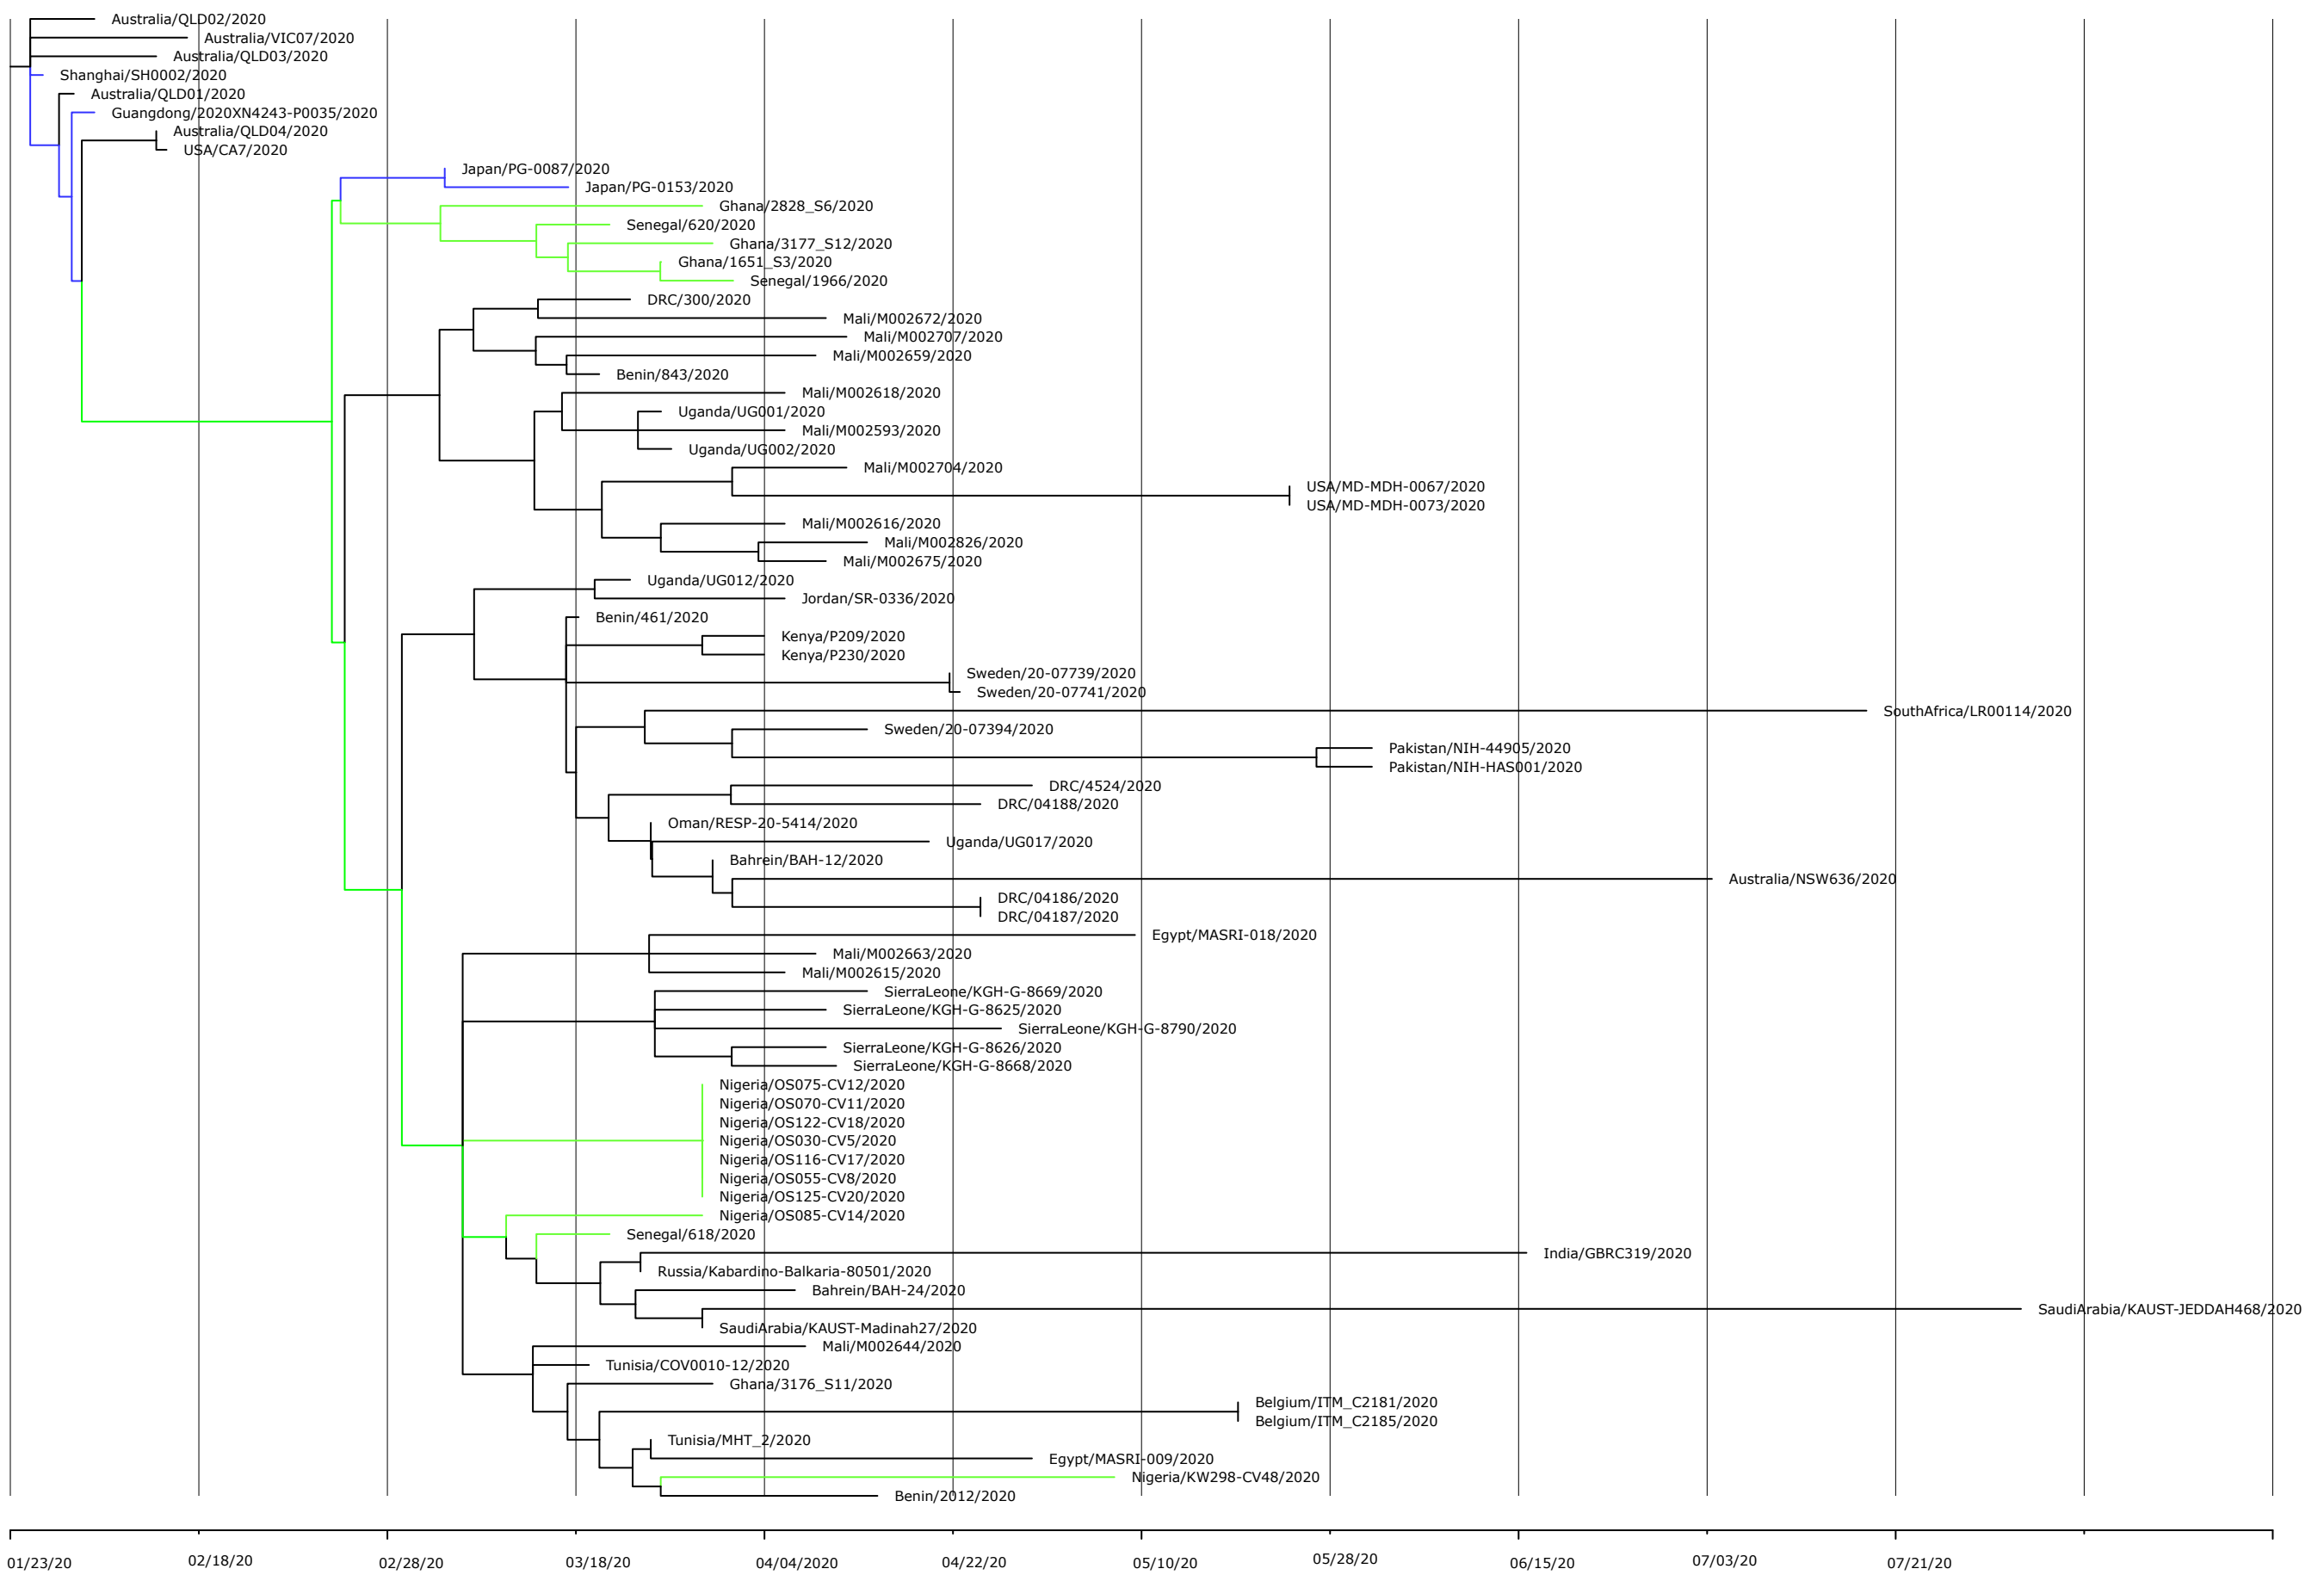

Supplement: 41598_2021_267_MOESM4_ESM.pdf [file 41598_2021_267_MOESM4_ESM.pdf]
