# Supplementary material for: Detailed phylogenetic analysis tracks transmission of distinct SARS-COV-2 variants from China and Europe to West Africa
Source: PubMed Central journal article supplement (PMC8548492; doi:10.1038/s41598-021-00267-w), 2021-10-26
Supplement: 41598_2021_267_MOESM5_ESM.pdf [file 41598_2021_267_MOESM5_ESM.pdf]

# a The share of COVID-19 tests that are positive

The daily positive rate, given as a rolling 7-day average.

# b The share of COVID-19 tests that are positive

The daily positive rate, given as a rolling 7-day average.

Our World in Data

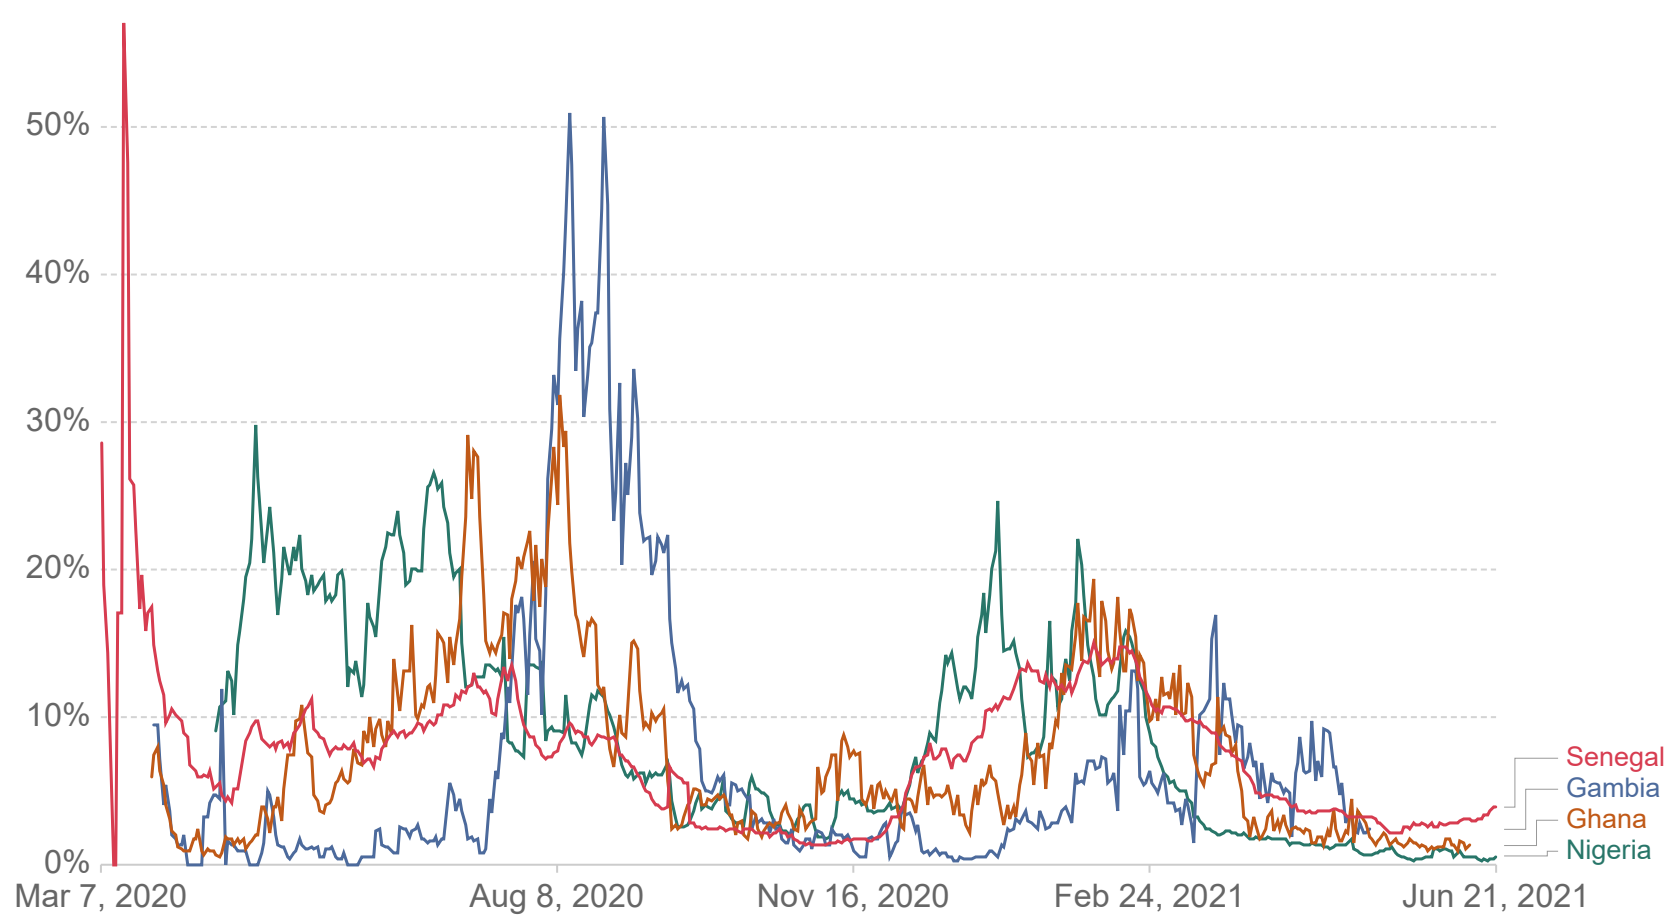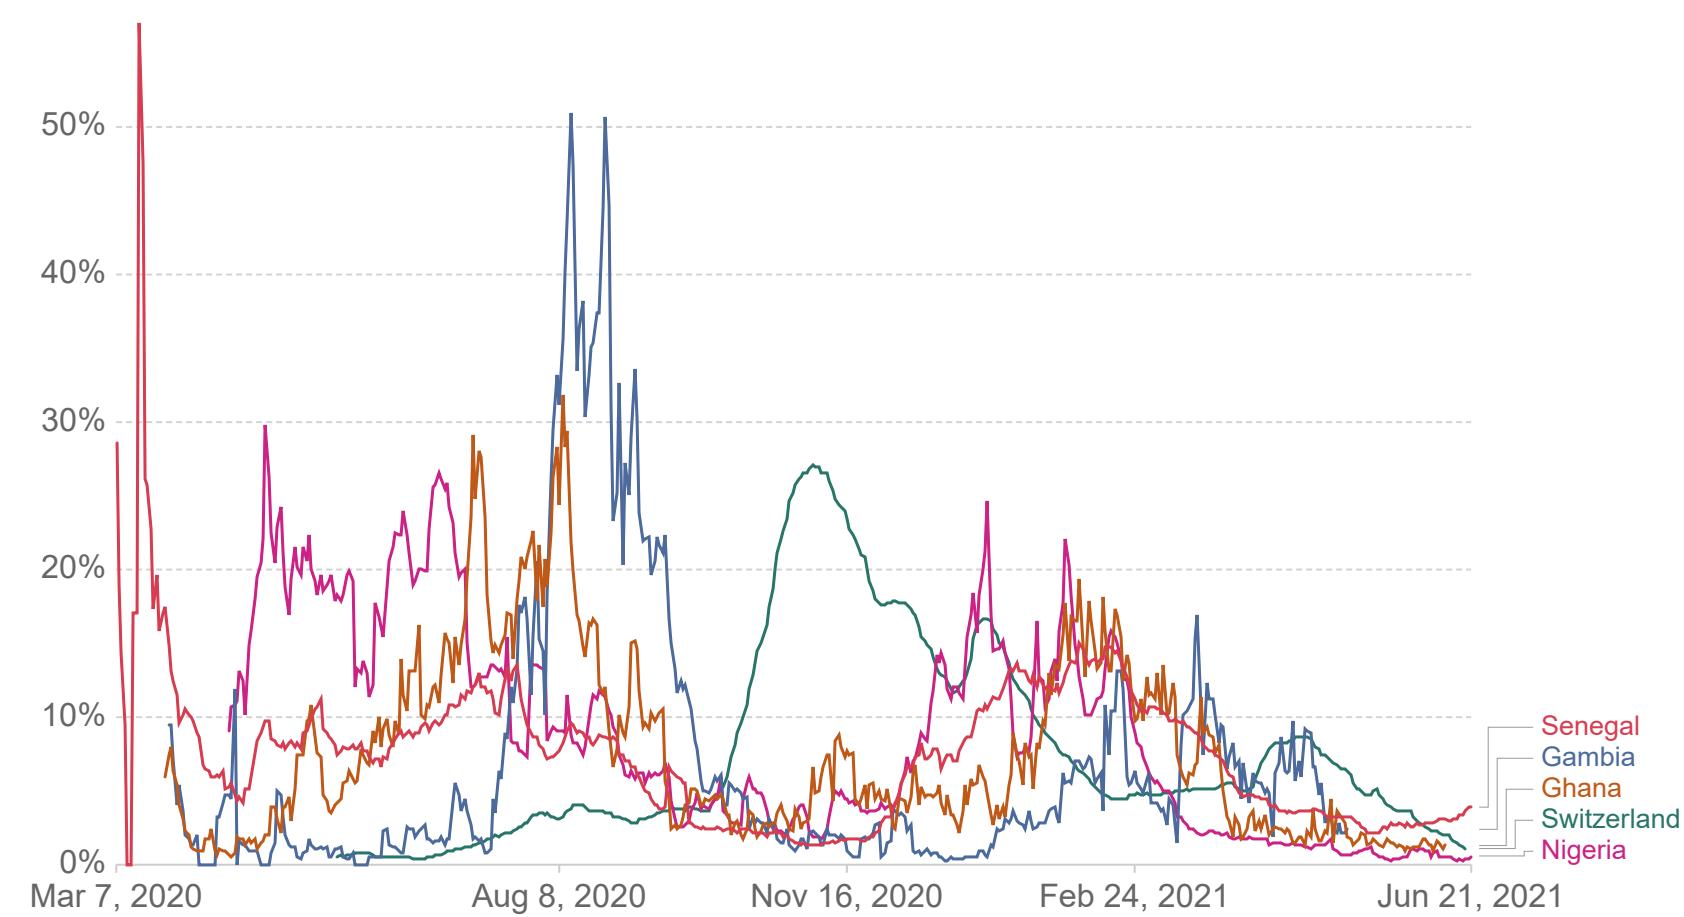

Source: Official data collated by Our World in Data – Last updated 22 June, 11:10 (London time) OurWorldInData.org/coronavirus • CC BY  
 Note: Comparisons of testing data across countries are affected by differences in the way the data are reported. Daily data is interpolated for countries not reporting testing data on a daily basis. Details can be found at our Testing Dataset page

Source: Official data collated by Our World in Data – Last updated 22 June, 11:10 (London time) OurWorldInData.org/coronavirus • CC BY  
 Note: Comparisons of testing data across countries are affected by differences in the way the data are reported. Daily data is interpolated for countries not reporting testing data on a daily basis. Details can be found at our Testing Dataset page

# c Daily COVID-19 tests per thousand people

The figures are given as a rolling 7-day average.

# d Daily COVID-19 tests per thousand people

The figures are given as a rolling 7-day average.

Our World in Data

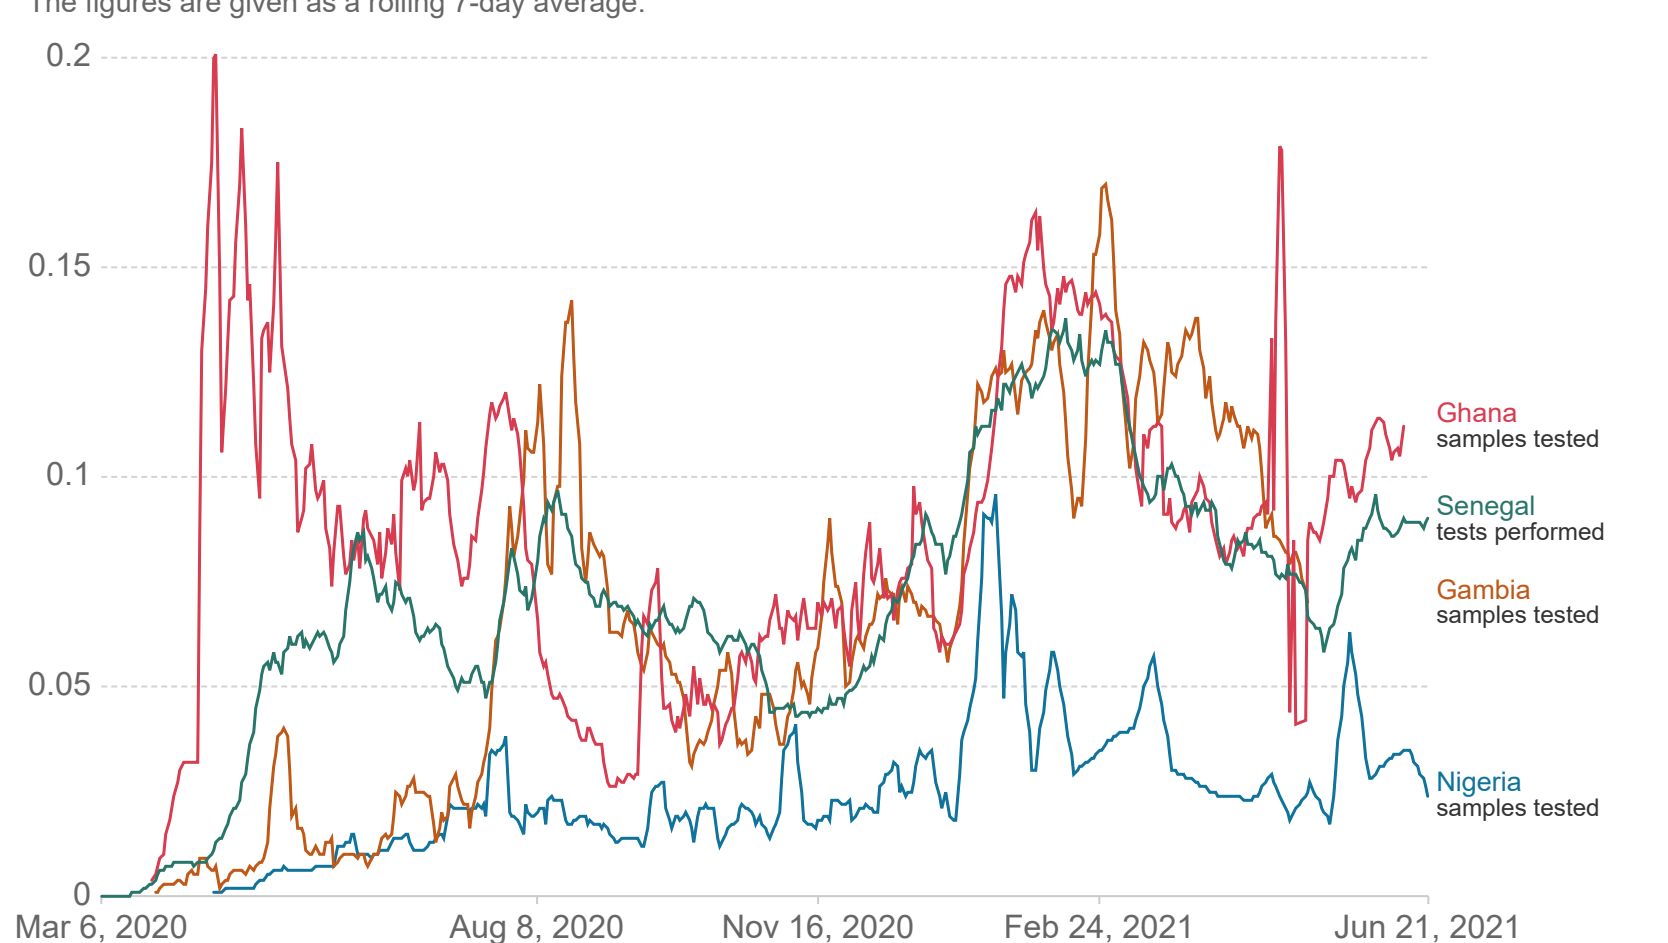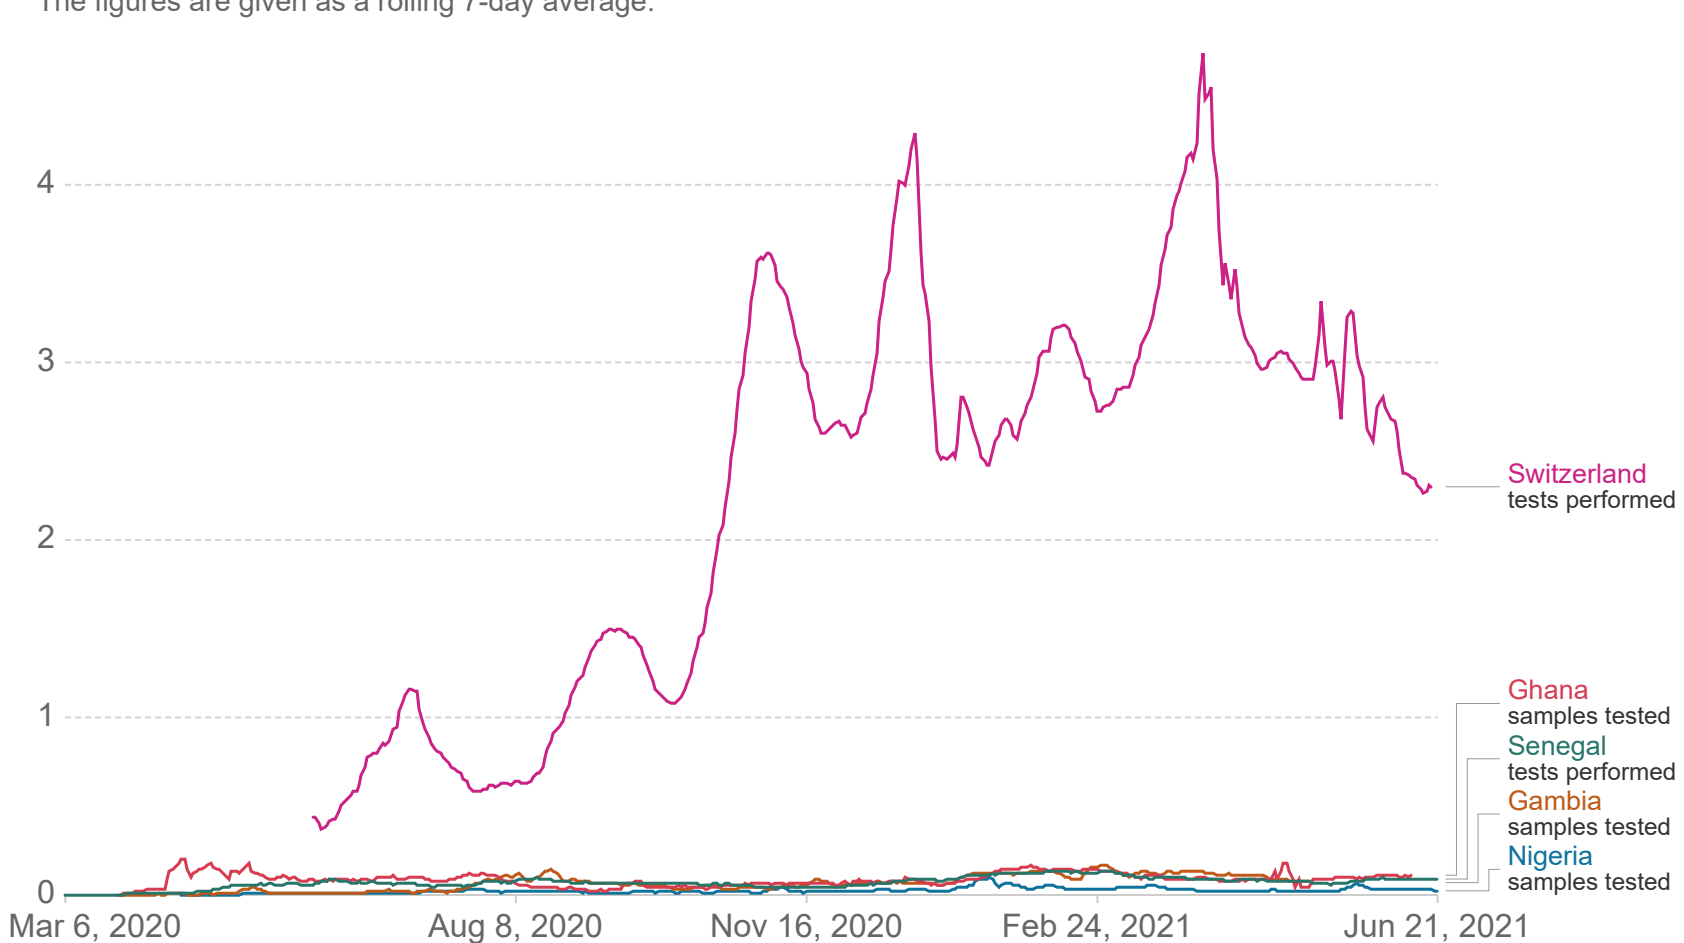

Source: Official data collated by Our World in Data – Last updated 22 June, 11:10 (London time) OurWorldInData.org/coronavirus • CC BY  
 Note: Comparisons of testing data across countries are affected by differences in the way the data are reported. Daily data is interpolated for countries not reporting testing data on a daily basis. Details can be found at our Testing Dataset page.

Source: Official data collated by Our World in Data – Last updated 22 June, 11:10 (London time) OurWorldInData.org/coronavirus • CC BY  
 Note: Comparisons of testing data across countries are affected by differences in the way the data are reported. Daily data is interpolated for countries not reporting testing data on a daily basis. Details can be found at our Testing Dataset page.
